# Supplementary material
Source: PubMed Central journal article supplement (PMC2577248)

**Supplementary Table 3:** Effect of NO suppression on characteristics of ethylene production in tobacco in response to *Pseudomonas syringae* pathovar *phaseolicola*.

| Treatment   | C <sub>2</sub> H <sub>4</sub> -I                                 |                             |            | C <sub>2</sub> H <sub>4</sub> -II                              |              | Mean C <sub>2</sub> H <sub>4</sub> I/<br>C <sub>2</sub> H <sub>4</sub> -2 Height<br>ratio | Mean C <sub>2</sub> H <sub>4</sub> II/<br>C <sub>2</sub> H <sub>4</sub> -2 area<br>ratio |
|-------------|------------------------------------------------------------------|-----------------------------|------------|----------------------------------------------------------------|--------------|-------------------------------------------------------------------------------------------|------------------------------------------------------------------------------------------|
|             | Mean Peak<br>Height<br>(nmol h <sup>-1</sup> gfw <sup>-1</sup> ) | Mean Peak<br>Position (hpi) | Peak Area  | Maximum<br>height<br>(nmol h <sup>-1</sup> gfw <sup>-1</sup> ) | Area         |                                                                                           |                                                                                          |
| <i>Psph</i> | 31.1 (1.0)                                                       | 1.9 (0.1)                   | 60.1(1.2)  | 48.8 (2.5)                                                     | 214.3 (11.1) | 0.7 (0.3)                                                                                 | 0.2 (0.1)                                                                                |
| L-NAME 1    | 28.5 (5.1)                                                       | 2.3 (0.1)                   | 69.5 (2.3) | 8.1 (1.5)                                                      | 66.6 (8.6)   | 4.0 (1.4)                                                                                 | 1.1 (0.1)                                                                                |
| D-NAME 1    | 20.1                                                             | 2.4                         | 73.2       | 30.7                                                           | 82.8         | 0.7                                                                                       | 1.0                                                                                      |
| L-NAME 2    | 30.9                                                             | 2.5                         | 44.8       | 7.5                                                            | 45.4         | 4.1                                                                                       | 0.9                                                                                      |
| D-NAME 2    | 36.0                                                             | 2.5                         | 65.9       | 38.9                                                           | 134.2        | 0.9                                                                                       | 0.5                                                                                      |
| L-NAME 3    | 32.5 (5.1)                                                       | 3.1 (0.6)                   | 75.1 (5.6) | 11.6 (3.8)                                                     | 126.1 (12.9) | 3.4 (1.0)                                                                                 | 0.5 (0.3)                                                                                |
| D-NAME 3    | 33.2                                                             | 2.7                         | 68.6       | 36.4                                                           | 21.3         | 1.0                                                                                       | 0.6                                                                                      |
| CPTIO 1     | 32.5 (4.0)                                                       | 2.5 (0.6)                   | 69.5 (4.4) | 23.3 (2.3)                                                     | 117.0 (11.0) | 1.4 (0.3)                                                                                 | 0.6 (0.1)                                                                                |
| CPTIO 2     | 38.0 (3.0)                                                       | 2.9 (2.4)                   | 62.3 (6.4) | 7.0 (1.5)                                                      | 45.4 (3.9)   | 4.7 (0.8)                                                                                 | 1.4 (0.1)                                                                                |
| CPTIO 3     | 32.5 (1.5)                                                       | 3.2 (0.1)                   | 66.2 (1.9) | 23.6 (2.6)                                                     | 124.0 (22.0) | 1.4 (0.2)                                                                                 | 0.5 (0.1)                                                                                |

*Psph* = *Pseudomonas syringae* pathovar *phaseolicola*

Calculations were carried out as described in the legend of supplementary Table 1. Each calculation represented the mean of at least 6 replicates. The circled numbers indicate when L-NAME/D-NAME or CPTIO was introduced into leaf areas inoculated with *Psph*.

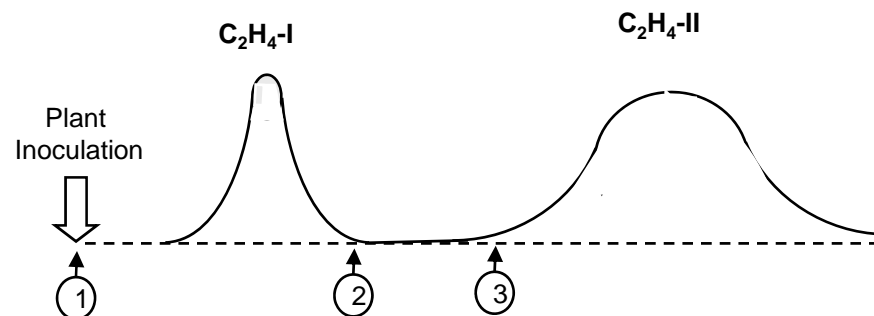

Supplement: pp.108.124404_7.pdf [file pp.108.124404_7.pdf]
