# Supplementary material
Source: PubMed Central journal article supplement (PMC2577248)
Supplement: pp.108.124404_1.pdf [file pp.108.124404_1.pdf]

Figure S1

|                                  |        | Treatment                      |                         |                               |                                 |                               |                                   |                                                              | Annotation                                                    |
|----------------------------------|--------|--------------------------------|-------------------------|-------------------------------|---------------------------------|-------------------------------|-----------------------------------|--------------------------------------------------------------|---------------------------------------------------------------|
|                                  |        | <i>Alternaria brassicicola</i> | <i>Botrytis cinerea</i> | <i>Erysiphe cichoracearum</i> | <i>P. s. pv. tomato avrRpm1</i> | H <sub>2</sub> O <sub>2</sub> | 1-aminocyclopropane-1-carboxylate | Salicylic acid                                               |                                                               |
| Fold up-regulation over controls |        | 1.019                          | 0.943                   | 0.929                         | 0.987                           | 0.932                         | 1.085                             | 0.814                                                        | At5g51690 -aminocyclopropane-1-carboxylate synthase (ACS12)   |
|                                  |        | 1.006                          | 1.189                   | 0.704                         | 1.167                           | 0.654                         | 1.18                              | 0.435                                                        | At5g65800-aminocyclopropane-1-carboxylate synthase (ACS5)     |
|                                  |        |                                |                         |                               |                                 |                               |                                   |                                                              | At3g61510 1-aminocyclopropane -1-carboxylate synthase         |
|                                  |        | 0.835                          | 0.686                   | 0.747                         | 0.799                           | 1.547                         | 1.165                             | 0.97                                                         | At5g28360 1-aminocyclopropane-1-carboxylate synthase (ACS1)   |
|                                  |        | 0.964                          | 0.563                   | 0.6                           | 0.706                           | 0.826                         | 1.227                             | 0.669                                                        | At2g22810 1-aminocyclopropane-1-carboxylate synthase 4 (ACS4) |
|                                  |        | 1.338                          | 0.615                   | 0.959                         | 0.983                           | 0.741                         | 0.978                             | 0.97                                                         | At1g62960 1-aminocyclopropane-1-carboxylate synthase (ACS10)  |
|                                  |        | 1.253                          | 2.199                   | 0.769                         | 1.256                           | 1.067                         | 0.793                             | 1.191                                                        | At1g62380 1-aminocyclopropane -1-carboxylate oxidase ,        |
|                                  |        | 1.582                          | 0.7                     | 0.849                         | 1.534                           | 2.517                         | 1.507                             | 1.387                                                        | At4g262001-aminocyclopropane-1-carboxylate synthase (ACS7)    |
|                                  |        | 0.56                           | 0.457                   | 0.724                         | 0.991                           | 1.619                         | 2.529                             | 1.463                                                        | At4g377701-aminocyclopropane-1-carboxylate synthase (ACS8) ,  |
|                                  |        | 4.393                          | 1.053                   | 0.954                         | 0.743                           | 2.088                         | 1.971                             | 0.409                                                        | At4g08040 1-aminocyclopropane -1-carboxylate synthase (ASC11) |
|                                  |        | 0.583                          | 3.907                   | 0.919                         | 1.175                           | 0.637                         | 0.565                             | 0.335                                                        | At3g49700 1-aminocyclopropane-1-carboxylate synthase (ASC9).  |
|                                  |        | 2.066                          | 3.02                    | 1.23                          | 1.598                           | 7.014                         | 0.991                             | 1.642                                                        | At4g112801-aminocyclopropane-1-carboxylate synthase 6 (ACS6)  |
|                                  |        | 0.889                          | 0.938                   | 0.946                         | 1.054                           | 1.018                         | 1.956                             | 0.794                                                        | At2g19590 1-aminocyclopropane -1-carboxylate oxidase          |
|                                  | 18.023 | 24.764                         | 0.717                   | 7.114                         | 2.972                           | 0.334                         | 3.191                             | At1g01480 -aminocyclopropane-1-carboxylate synthase 2 (ACS2) |                                                               |

**Supplementary Figure S1:** Expression of Ethylene Biosynthetic genes in *Arabidopsis* following pathogenic challenge or treatment with defence associated chemicals.

The Meta-analysis tool in Genevestigator (Zimmermann *et al.*, 2004) was utilised to display publicly available *Arabidopsis* microarray data. Displayed are the fold expression ratios over control microarrays, within colour coded heat maps where red indicates gene induction and green, gene suppression. Results are give for expressed genes (i.e. not pseudogenes) corresponding to ACC synthase and ACC oxidase in the *Arabidopsis* genome. Depicted are responses to the following stimuli. Gene expression in response to the necrotroph *Alternaria brassicicola* was at 48 h following the application of 3  $\mu\text{L}$  drops of 10 mM  $\text{MgSO}_4$  containing  $10^6$  spores. $\text{mL}^{-1}$  onto all fully expanded leaves

(<http://affymetrix.arabidopsis.info/narrays/experimentpage.pl?experimentid=330#>; M. De Vos, V. R. Van Oosten, R. M. P. Van Poecke, J. A. Van Pelt, M. J. Pozo, M. J. Mueller, A. J. Buchala, J.-P. Métraux, L. C. Van Loon, M. Dicke, and C. M. J. Pieterse. (2005) Signal signature and transcriptome changes of *Arabidopsis* during pathogen and insect attack. *Mol. Plant Path. Interact.* **18**: 923-937.

Responses to the necrotrophic pathogen *Botrytis cinerea* represented fold increased gene expression at 48 h following application of 5 mL of  $5 \times 10^5$ . $\text{mL}^{-1}$  conidiospores on each of 4-5 fully expanded rosette leaves per plant (C. Denoux, F. Ausubel, J. Dewdney, S. Ferrari, Massachusetts General Hospital; USA

[http://arabidopsis.org/servlets/TairObject?type=expression\\_set&id=1007967417](http://arabidopsis.org/servlets/TairObject?type=expression_set&id=1007967417)).

Data describing the responses 3 days after inoculation with the biotrophic powdery mildew pathogen, *Erysiphe cichoracearum*, race UCSC were obtained from <http://www.ncbi.nlm.nih.gov/projects/geo/query/acc.cgi?acc=GSE431&view=quick>;

Nishimura, M.T., Stein, M., Hou, B.H., Vogel, J.P., Edwards, H. and Somerville, S.C. (2003) Loss of a callose synthase results in salicylic acid-dependent disease resistance. *Science.* **301**:969-972.

The response of the targeted genes to inoculation with  $10^8$  cfu. $\text{mL}^{-1}$  *Pseudomonas syringae* pv. *tomato avrRpm1* in 10 mM  $\text{MgCl}_2$  at 24 h was obtained from

[http://arabidopsis.org/servlets/TairObject?type=expression\\_set&id=1007966202](http://arabidopsis.org/servlets/TairObject?type=expression_set&id=1007966202) (B. Kemmerling, T. Nürnberger, University of Tübingen, Germany).
