# Supplementary material
Source: PubMed Central journal article supplement (PMC2577248)
Supplement: pp.108.124404_2.pdf [file pp.108.124404_2.pdf]

Figure S3

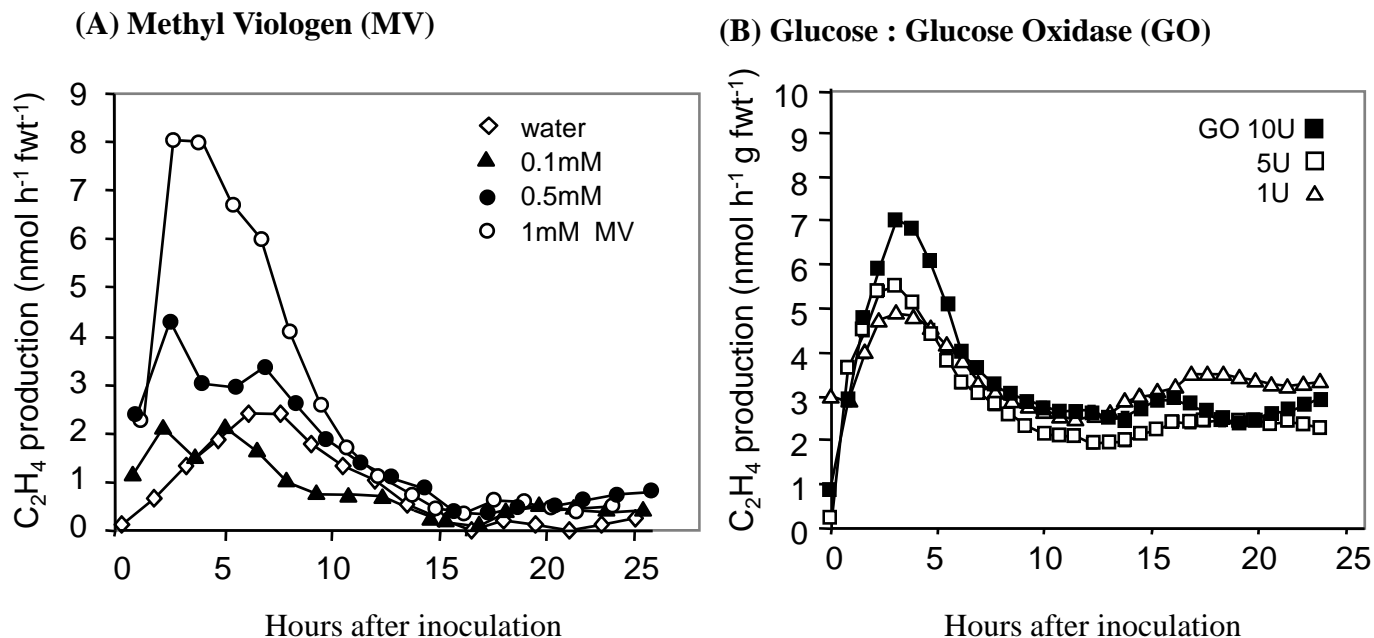

**Supplementary Figure S3:** Ethylene production initiated by oxidative stress.

Ethylene production following treatment of leaves from wild type tobacco cv. Samsun NN with (A) 0.1 (▲), 0.5 (●) and 1.0 (○) mM methyl-viologen (MV) or water (◇) or (B) 1mM glucose with either 1 U (△); 5 U (□);10 U (■). mL<sup>-1</sup> glucose oxidase.
