# Supplementary material
Source: PubMed Central journal article supplement (PMC2577248)
Supplement: pp.108.124404_3.pdf [file pp.108.124404_3.pdf]

Supplementary Figure 3:

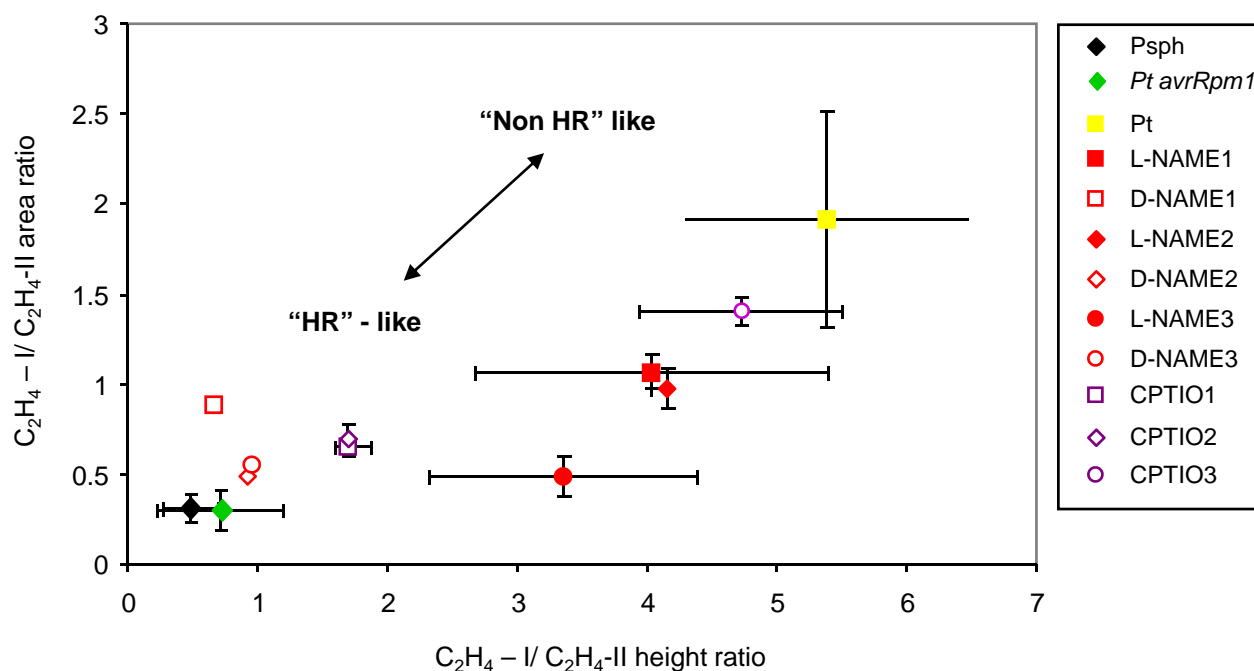

The C<sub>2</sub>H<sub>4</sub> - I / C<sub>2</sub>H<sub>4</sub>-II height and area ratios shown in Supplementary Table 1 and 3 are plotted. Note that strains which elicit a hypersensitive response (*Psph*; *Pseudomonas syringae* pathovar *phaseolicola* and *Pt avrRpm1* = *Pseudomonas syringae* pv. *tabaci avrRpm1*) form a tightly associated and distinctive grouping whilst virulent (*Pt* = *Pseudomonas syringae* pv. *tabaci*) or hrp compromised mutants (*Psph*; *Pseudomonas syringae* pathovar *phaseolicola hrpA*) patterns are more variable. A putative trend in ethylene biosynthetic patterns from “HR-like” to “non HR”-like is indicated by an arrow. Ethylene production patterns following the additions of either L-NAME, D-NAME or CPTIO to a developing *Psph* elicited HR are also plotted. The experimental details are given in the legend of Supplementary Table 3. Note that L-NAME and to a lesser extent CPTIO, shifts the ethylene production towards “non-HR” like patterns.
