# Supplementary material
Source: PubMed Central journal article supplement (PMC2577248)
Supplement: pp.108.124404_4.pdf [file pp.108.124404_4.pdf]

Supplementary Figure 4:

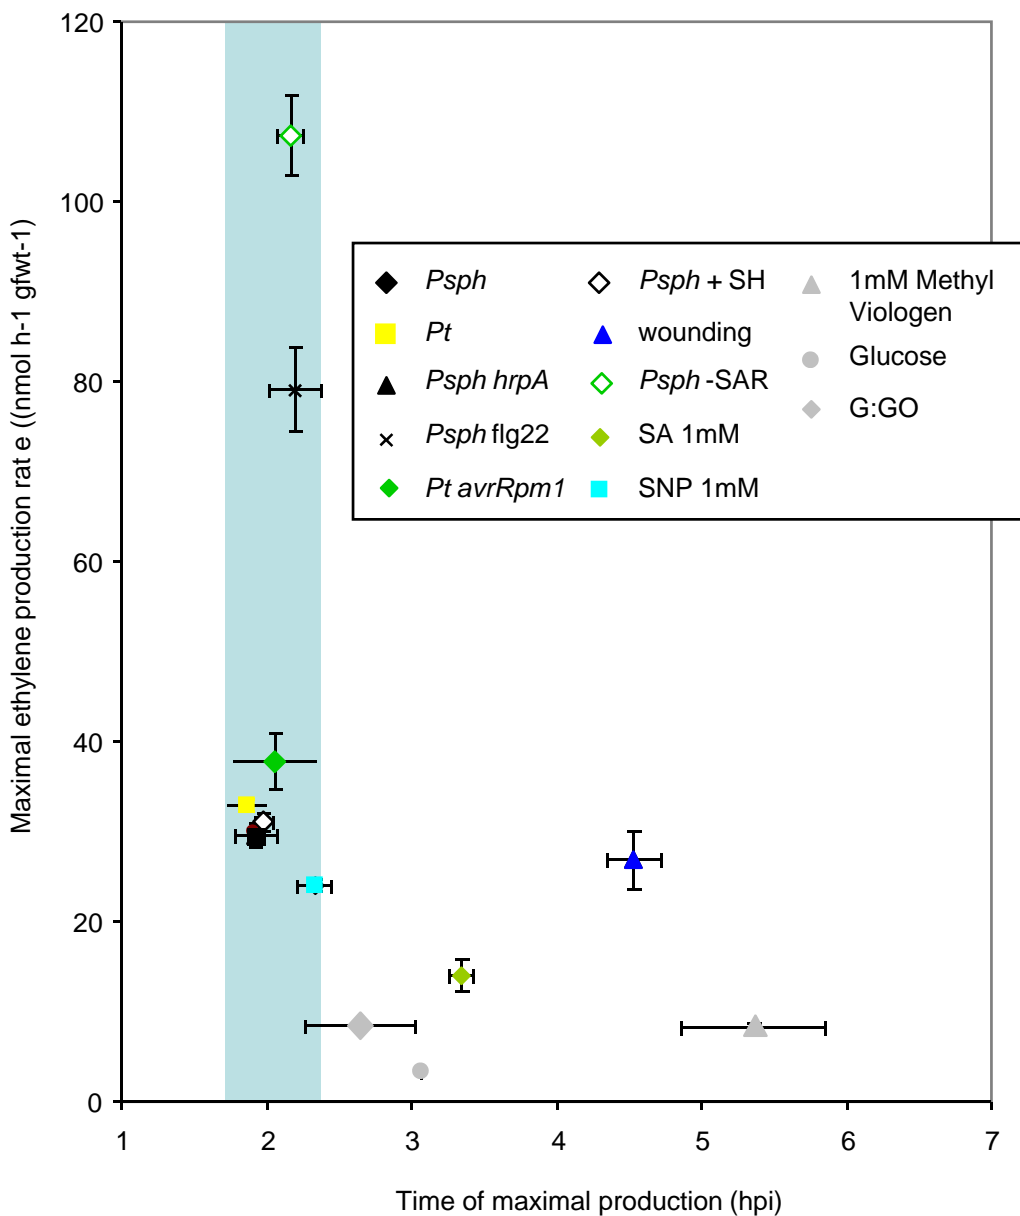

Maximal rates of ethylene production and its timings within C<sub>2</sub>H<sub>4</sub> – I shown in Supplementary Tables 1 and 2 are plotted. Methodological details are described in the associated legends and in the main text. The timings of pathogen-elicited C<sub>2</sub>H<sub>4</sub>-I (*Psph* = *Pseudomonas syringae* pathovar *phaseolicola*; *Pt* = *Pseudomonas syringae* pv. *tabaci* *Pt avrRpm1* = *Pseudomonas syringae* pv. *tabaci avrRpm1*; *Psph*; *hrpA* = *hrp* compromised mutants *Pseudomonas syringae* pathovar *phaseolicola*) in wild type or SH (salicylate hydroxylase) transgenic lines or plants exhibiting SAR (systemic acquired resistance) are indicated by grey shading. Note that, of the chemical treatments, only the NO<sup>+</sup> donor sodium nitroprusside (SNP) or the oxidative stress generating Glucose: Glucose Oxide (G:GO) led to C<sub>2</sub>H<sub>4</sub>-I patterns which resembled those elicited by pathogens.
