# Supplementary material
Source: PubMed Central journal article supplement (PMC2577248)
Supplement: pp.108.124404_6.pdf [file pp.108.124404_6.pdf]

**Supplementary Table 2::** Influence of salicylic acid on ethylene production in tobacco in response to *Pseudomonas syringae*

| Plant Condition/<br>Genotype | C <sub>2</sub> H <sub>4</sub> -I                                 |                             |             | C <sub>2</sub> H <sub>4</sub> -II                              |              | Mean C <sub>2</sub> H <sub>4</sub> I/<br>C <sub>2</sub> H <sub>4</sub> -II Height<br>ratio | Mean C <sub>2</sub> H <sub>4</sub> I/<br>C <sub>2</sub> H <sub>4</sub> -II area<br>ratio |
|------------------------------|------------------------------------------------------------------|-----------------------------|-------------|----------------------------------------------------------------|--------------|--------------------------------------------------------------------------------------------|------------------------------------------------------------------------------------------|
|                              | Mean Peak<br>Height<br>(nmol h <sup>-1</sup> gfw <sup>-1</sup> ) | Mean Peak<br>Position (hpi) | Peak Area   | Maximum<br>height<br>(nmol h <sup>-1</sup> gfw <sup>-1</sup> ) | Area         |                                                                                            |                                                                                          |
| WT- <i>Psph</i>              | 31.1 (1.0)                                                       | 1.9 ( 0.1)                  | 60.1 (1.2)  | 48.8 (2.5)                                                     | 214.3 (11.1) | 0.7 (0.3)                                                                                  | 0.2 (0.1)                                                                                |
| WT- SH                       | 30.5 (9.2)                                                       | 1.9 ( 0.2)                  | 64.8 (7.7)  | 27.3 (2.9)                                                     | 84.7 (21.4)  | 1.5 (0.3)                                                                                  | 0.6 (0.2)                                                                                |
| WT- SAR control              | 29.1 (2.1)                                                       | 1.9 ( 0.1)                  | 63.9 (3.0)  | 40.1 (1.0)                                                     | 187.6 (16.1) | 0.7 (0.3)                                                                                  | 0.3 (0.1)                                                                                |
| WT- SAR                      | 107.3 (5.5)                                                      | 2.7 ( 0.1)                  | 269.3 (9.3) | 39.3 (1.9)                                                     | 179.3 (18.9) | 0.3 (0.1)                                                                                  | 0.4 (0.2)                                                                                |
| WT - H <sub>2</sub> O        | 2.9 (2.8)                                                        | 3.7 ( 0.1)                  | 9.1 (0.8)   |                                                                |              |                                                                                            |                                                                                          |
| WT - 1mM SA                  | 14.9 (0.8)                                                       | 3.9 ( 0.2)                  | 85.8 (3.3)  |                                                                |              |                                                                                            |                                                                                          |

*Psph* = *Pseudomonas syringae* pv. *phaseolicola*; SAR = Systemic Acquired Resistance; *NahG* = Salicylate hydroxylase transgenic tobacco plants

See main text for methodological details. Calculations were carried out as described in the legend of supplementary Table 1. Each calculation represented the mean of at least 6 replicates, ANOVA of ethylene production in WT ("WT-*Psph*") and SH ("WT-SH") tobacco indicated that there were no significant differences in C<sub>2</sub>H<sub>4</sub>-I ( $P = 0.13274$ ) but C<sub>2</sub>H<sub>4</sub>-II differed significantly ( $P < 0.001$ ). Conversely ANOVA of ethylene production following inoculation with *Psph* of SAR exhibiting tissue ("WT-SAR") compared to non-SAR exhibiting equivalent leaves ("WT-SAR controls") indicated that C<sub>2</sub>H<sub>4</sub>-I was significantly different ( $P < 0.001$ ) whilst differences in C<sub>2</sub>H<sub>4</sub>-II were not significant ( $P = 0.09$ ).
